# Supplementary material for: Synthesis and evaluation of a series of resveratrol analogues as potent anti-cancer agents that target tubulin
Source: Royal Society of Chemistry journal article supplement (doi:10.1039/c4md00478g), 2015-01-01
Supplement: c4md00478g1.pdf [file c4md00478g1.pdf]

### Supplementary Table:

Comparison of residues lining the colchicine binding cavity in tubulin for colchicine and resveratrol analogues **3b** and **4a**.

|                  | <b>Colchicine</b> | <b>3b</b> | <b>4a</b> |
|------------------|-------------------|-----------|-----------|
| <b>α-SUBUNIT</b> | N101              | -         | -         |
|                  | S178              | S178      | S178      |
|                  | T179              | T179      | T179      |
|                  | A180              | A180      | A180      |
|                  | V181              | V181      | V181      |
|                  | Y224              | -         | -         |
| <b>β-SUBUNIT</b> | V238              | -         | -         |
|                  | T239              | -         | -         |
|                  | C241              | C241      | C241      |
|                  | L242              | L242      | L242      |
|                  | L248              | L248      | L248      |
|                  | A250              | A250      | A250      |
|                  | D251              | D251      | D251      |
|                  | L252              | -         | -         |
|                  | K254              | K254      | K254      |
|                  | L255              | L255      | L255      |
|                  | N258              | N258      | N258      |
|                  | M259              | M259      | M259      |
|                  | T314              | -         | T314      |
|                  | V315              | -         | V315      |
|                  | A316              | A316      | A316      |
|                  | A317              | A317      | A317      |
|                  | V318              | V318      | V318      |
|                  | N350              | -         | N350      |
|                  | V351              | -         | V351      |
|                  | K352              | K352      | K352      |
|                  | -                 | -         | T353      |
|                  | -                 | -         | A354      |
| I378             | I378              | I378      |           |

Residues are numbered as in the PDB 1SA0 file. Residues common to all three binding sites are not highlighted. Those unique to colchicine are highlighted **red**, while those that are either unique to **4a** (T353, A354), or are common to **4a** and colchicine (T314, V315, N350, V351) are highlighted **yellow**.

All starting materials used in this study were of at least reagent grade and were purchased from Sigma Aldrich and TCI America. Intermediate **5** was prepared as previously reported by Ruan *et al.*<sup>1</sup> and analytical data is consistent with the reported data.

### Analytical data:

**Compound 5:** Pale yellow solid; 61 % yield. <sup>1</sup>H NMR (400 MHz, DMSO-*d*<sub>6</sub>): δ 3.78 (s, 3H), 3.90 (s, 3H), 3.92 (s, 3H), 6.63 (s, 1H), 6.91 (s, 1H), 6.97 (d, 2H, *J* = 7.9 Hz), 7.21 (d, 1H, *J* = 16.2 Hz), 7.50 (d, 2H, *J* = 7.9 Hz), 7.95 (d, 1H, *J* = 16.2 Hz), 10.41 (s, 1H) ppm. <sup>13</sup>C-NMR (DMSO-*d*<sub>6</sub>): 55.8, 56.1, 101.2, 102.5, 109.8, 114.3, 129.4, 130.5, 131.4, 139.7, 162.5, 167.8, 193.5 ppm. HRMS (ESI): *m/z* calcd for C<sub>18</sub>H<sub>19</sub>O<sub>4</sub> [M-H] 299.1283; found 299.1298.

**Compound 3a:** White solid; 82 % yield. <sup>1</sup>H NMR (400 MHz, DMSO-*d*<sub>6</sub>): δ 3.67 (s, 3H, -OCH<sub>3</sub>), 3.81 (s, 3H, -OCH<sub>3</sub>), 3.83 (s, 6H, -OCH<sub>3</sub>), 6.96 (s, 2H, -ArH), 7.09 (d, *J* = 8.4 Hz, 1H, ArH), 7.88-7.91(m, 4H, ArH) ppm. <sup>13</sup>C NMR (100 MHz, DMSO-*d*<sub>6</sub>): 55.88, 56.52, 60.59, 103.58, 107.54, 114.92, 118.89, 126.72, 130.22, 131.47, 138.56, 142.59, 153.65, 161.48 ppm. HRMS (ESI): *m/z* calcd for C<sub>19</sub>H<sub>20</sub>NO<sub>4</sub> [M-H] 326.1392; found 326.1395.

**Compound 3b:** White solid; 72 % yield. <sup>1</sup>H NMR (400 MHz, DMSO-*d*<sub>6</sub>): δ 3.69 (s, 3H, -OCH<sub>3</sub>), 3.86 (s, 9H, -OCH<sub>3</sub>), 6.97 (s, 2H, -ArH), 7.09 (d, *J* = 8.4 Hz, 1H, ArH), 7.39 (d, *J* = 8.4 Hz, 1H, ArH), 7.51 (s, 1H, ArH), 7.84 (s, 1H, ArH), 9.42 (s, 1H, -OH). <sup>13</sup>C NMR (100 MHz, DMSO-*d*<sub>6</sub>): 56.08, 56.52, 60.58, 103.52, 107.09, 112.39, 115.61, 118.88, 122.96, 130.37, 138.45, 143.00, 146.93, 150.50, 153.63 ppm. HRMS (ESI): *m/z* calcd for C<sub>19</sub>H<sub>20</sub>NO<sub>5</sub> [M-H] 342.1341; found 342.1347.

**Compound 3c:** yellow solid; 85 % yield. <sup>1</sup>H NMR (400 MHz, DMSO-*d*<sub>6</sub>): δ 3.79 (s, 3H, -OCH<sub>3</sub>), 3.84(s, 3H, -OCH<sub>3</sub>), 3.85(s, 3H, -OCH<sub>3</sub>), 7.04 (t, *J* = 15.2 Hz, 2H, ArH), 7.23 (dd, *J* = 2, 8.8 Hz, 1H, ArH), 7.29 (s, 1H, ArH), 7.38 (dd, *J* = 1.6, 8.4 Hz, 1H, ArH), 7.49 (s, 1H, ArH), 7.77(s, 1H, ArH), 9.38 (s, 1H, -OH) ppm. <sup>13</sup>C NMR (100 MHz, DMSO-*d*<sub>6</sub>): 55.93, 55.96, 56.02, 56.13, 56.16, 56.23, 107.16, 108.79, 112.23, 112.34, 112.39, 115.41, 115.65, 118.94, 118.97, 119.08, 122.75, 127.20, 127.29, 141.15, 141.37, 146.90, 149.53, 149.91, 150.22 ppm. HRMS (ESI): *m/z* calcd for C<sub>18</sub>H<sub>18</sub>NO<sub>4</sub> [M-H] 312.1236; found 312.1243.

**Compound 3d:** White solid; 70 % yield. <sup>1</sup>H NMR (400 MHz, DMSO-*d*<sub>6</sub>): δ 3.71 (s, 3H, -OCH<sub>3</sub>), 3.80 (s, 6H, -OCH<sub>3</sub>), 3.87 (s, 6H, -OCH<sub>3</sub>), 6.65 (s, 1H, -ArH), 7.01 (s, 2H, -ArH), 7.12 (d, *J* = 2 Hz, 2H, ArH), 7.96 (s, 1H, -ArH) ppm. <sup>13</sup>C NMR (100 MHz, DMSO-*d*<sub>6</sub>): 56.32, 57.05, 61.10, 103.39, 104.39, 107.97, 111.57, 118.82, 130.18, 136.34, 139.49, 143.29, 154.16, 161.49 ppm. HRMS (ESI): *m/z* calcd for C<sub>20</sub>H<sub>22</sub>NO<sub>5</sub> [M-H] 356.1498; found 356.1504.

**Compound 3e:** White solid; 75 % yield. <sup>1</sup>H NMR (400 MHz, DMSO-*d*<sub>6</sub>): δ 3.81 (s, 6H, -OCH<sub>3</sub>), 6.71 (s, 1H, -ArH), 7.21 (s, 2H, -ArH), 8.04 (d, *J* = 9.2 Hz, 2H, ArH), 8.25 (s, 1H, -ArH), 8.37 (d, *J* = 8.8 Hz, 2H, ArH) ppm. <sup>13</sup>C NMR (100 MHz, DMSO-*d*<sub>6</sub>): 55.8, 99.5, 99.6, 105.4, 118.5, 124.5, 125.6, 125.8, 132.4, 136.5, 140.8, 147.1 ppm. HRMS (ESI): *m/z* calcd for C<sub>17</sub>H<sub>15</sub>N<sub>2</sub>O<sub>4</sub> [M-H] 311.1032; found 311.1033.

**Compound 3f:** White solid; 70 % yield. <sup>1</sup>H NMR (400 MHz, DMSO-*d*<sub>6</sub>): δ 3.79 (s, 6H, -OCH<sub>3</sub>), 3.81 (s, 3H, -OCH<sub>3</sub>), 3.71 (s, 6H, -OCH<sub>3</sub>), 6.62 (s, 1H, -ArH), 7.05-7.10 (m, 4H, ArH), 7.69 (d, *J* = 8.8 Hz, 2H, ArH), 7.84 (s, 1H, -ArH) ppm. <sup>13</sup>C NMR (100 MHz, DMSO-*d*<sub>6</sub>): 55.1, 55.4, 55.6, 111.4, 114.5, 115.9, 118.8, 126.7, 134.2, 135.1, 138.6, 142.9, 147.1, 149.1 ppm. HRMS (ESI): *m/z* calcd for C<sub>18</sub>H<sub>18</sub>NO<sub>3</sub> [M-H] 296.1287; found 296.1290.

**Compound 3g:** White solid; 90 % yield. <sup>1</sup>H NMR (400 MHz, DMSO-*d*<sub>6</sub>): δ 3.58 (s, 3H, -OCH<sub>3</sub>), 3.63 (s, 3H, -OCH<sub>3</sub>), 3.71 (s, 6H, -OCH<sub>3</sub>), 7.12 (s, 2H, -ArH), 7.15 (d, *J* = 8.0 Hz, 2H, ArH), 7.21 (d, *J* = 8.8 Hz, 2H, ArH), 7.36 (s, 1H, -ArH) ppm. <sup>13</sup>C NMR (100 MHz, DMSO-*d*<sub>6</sub>): 55.88, 55.2, 56.9, 101.5, 104.5, 114.9, 118.8, 126.7, 134.2, 135.1, 138.6, 142.9, 154.5, 155.8 ppm. HRMS (ESI): *m/z* calcd for C<sub>19</sub>H<sub>20</sub>NO<sub>4</sub> [M-H] 326.1392; found 326.1399.

**Compound 3h:** White solid; 72 % yield. <sup>1</sup>H NMR (400 MHz, DMSO-*d*<sub>6</sub>): δ 3.71-3.75 (m, 6H, -OCH<sub>3</sub>), 3.84 (s, 6H, -OCH<sub>3</sub>), 3.87 (s, 6H, -OCH<sub>3</sub>), 7.00 (s, 2H, -ArH), 7.32 (s, 2H, ArH), 7.94 (s, 1H, ArH) ppm. <sup>13</sup>C NMR (100 MHz, DMSO-*d*<sub>6</sub>): 60.5, 60.6, 103.6, 107.2, 109.4, 118.7, 129.4, 129.8, 138.8, 139.9, 142.8, 153.2, 153.6 ppm. HRMS (ESI): *m/z* calcd for C<sub>21</sub>H<sub>24</sub>NO<sub>6</sub> [M-H] 386.1604; found 386.1611.

**Compound 4a:** yellow solid; 90 % yield. <sup>1</sup>H NMR (400 MHz, DMSO-*d*<sub>6</sub>): δ 3.71 (s, 9H, -OCH<sub>3</sub>), 3.75 (s, 3H, -OCH<sub>3</sub>), 6.67 (s, 2H, -ArH), 6.72 (s, 1H, -ArH), 6.78 (d, *J* = 8.4 Hz, 1H, ArH), 6.89 (d, *J* = 8.4 Hz, 1H, ArH), 7.42 (s, 1H, ArH), 9.15 (s, 1H, -OH) ppm. <sup>13</sup>C NMR (100 MHz, DMSO-*d*<sub>6</sub>): 55.86, 56.07, 56.35, 56.57, 60.53, 60.75, 106.20, 106.38, 110.00, 112.06, 116.65, 121.06, 123.51, 126.45, 128.59, 138.55, 144.67, 144.94, 146.46, 150.16, 153.92 ppm. HRMS (ESI): *m/z* calcd for C<sub>19</sub>H<sub>20</sub>NO<sub>5</sub> [M-H] 342.1341; found 342.1348.

**Compound 4b:** brown solid; 74 % yield. <sup>1</sup>H NMR (400 MHz, DMSO-*d*<sub>6</sub>): δ 3.91 (s, 3H, -OCH<sub>3</sub>), 3.94(s, 6H, -OCH<sub>3</sub>), 7.03 (d, *J* = 13.2 Hz, 2H, ArH), 7.14 (s, 1H, ArH), 7.24 (d, *J* = 2, 8.4 Hz, 1H, ArH), 7.30 (s, 1H, ArH), 7.31 (s, 1H, ArH), 7.35 (d, *J* = 10.4

Hz, 1H, ArH) ppm. <sup>13</sup>C NMR (100 MHz, DMSO-*d*<sub>6</sub>): 55.95, 56.07, 108.69, 108.74, 109.18, 110.59, 110.61, 111.26, 115.06, 115.19, 118.44, 118.75, 122.02, 122.12, 127.47, 127.66, 140.15, 140.24, 145.66, 148.25, 149.23, 149.76 ppm. HRMS (ESI): *m/z* calcd for C<sub>18</sub>H<sub>18</sub>NO<sub>4</sub> [M-H] 312.1236; found 312.1243.

**Compound 7a:** pale yellow solid; 60 % yield. <sup>1</sup>H NMR (DMSO-*d*<sub>6</sub>): δ 3.71 (s, 3H, -OCH<sub>3</sub>), 3.75 (s, 3H, -OCH<sub>3</sub>), 3.82 (s, 3H, -OCH<sub>3</sub>), 3.85 (s, 6H, -OCH<sub>3</sub>), 3.89 (s, 3H, -OCH<sub>3</sub>), 6.61 (s, 1H, ArH), 6.94 (d, *J*=8.4 Hz, 2H), 7.00 (s, 3H, ArH), 7.08 (d, *J*=16 Hz, 2H), 7.28 (d, *J*=16 Hz, 2H), 7.49 (d, *J*=8.4 Hz, 1H), 7.98 (s, 1H, ArH) ppm. <sup>13</sup>C-NMR (DMSO-*d*<sub>6</sub>): δ 55.1, 55.3, 55.8, 56.1, 56.4, 98.2, 101.5, 104.7, 108.1, 110.5, 115.4, 117.6, 114.2, 121.4, 127.6, 131.7, 134.2, 159.7, 160.7, 162.8, 166.7 ppm. HRMS (ESI): *m/z* calcd for C<sub>29</sub>H<sub>30</sub>NO<sub>6</sub> [M-H] 488.2073; found 488.2077.

**Compound 7b:** pale yellow solid; 74 % yield. <sup>1</sup>H NMR (DMSO-*d*<sub>6</sub>): δ 3.74 (s, 3H, -OCH<sub>3</sub>), 3.81 (s, 6H, -OCH<sub>3</sub>), 3.84 (s, 3H, -OCH<sub>3</sub>), 3.89 (s, 3H, -OCH<sub>3</sub>), 6.60 (s, 1H, ArH), 6.93 (d, *J*=8.4 Hz, 2H), 6.97 (s, 1H, ArH), 7.03-7.07 (m, 2H), 7.28 (m, 2H), 7.33 (s, 1H, ArH), 7.47 (d, *J*=8.4 Hz, 2H), 7.89 (s, 1H, ArH) ppm. <sup>13</sup>C-NMR (DMSO-*d*<sub>6</sub>): δ 55.3, 55.4, 56.2, 56.4, 56.8, 56.9, 97.5, 100.8, 104.7, 108.4, 111.5, 111.8, 114.5, 124.7, 129.5, 131.4, 134.8, 138.4, 147.5, 149.6, 158.7, 163.8, 164.5 ppm. HRMS (ESI): *m/z* calcd for C<sub>27</sub>H<sub>26</sub>NO<sub>4</sub> [M-H] 428.1862; found 428.1869.

**Compound 7c:** White solid; 79 % yield. <sup>1</sup>H NMR (DMSO-*d*<sub>6</sub>): δ 3.75 (s, 3H, -OCH<sub>3</sub>), 3.81 (s, 9H, -OCH<sub>3</sub>), 3.89 (s, 3H, -OCH<sub>3</sub>), 6.61 (d, *J*=7.2 Hz, 2H), 6.87 (d, *J*=1.6 Hz, 2H), 6.94 (d, *J*=8.8 Hz, 2H), 6.98 (d, *J*=1.2 Hz, 1H), 7.07 (d, 1H, *J*=16.0 Hz, ArH), 7.27 (d, 1H, *J*=16.0 Hz, ArH), 7.49 (d, 1H, *J*=8.4 Hz, ArH), 8.03 (s, 1H, ArH) ppm. <sup>13</sup>C-NMR (DMSO-*d*<sub>6</sub>): δ 55.2, 55.8, 55.9, 99.5, 100.5, 101.7, 109.5, 118.6, 120.5, 114.2, 127.4, 131.4, 136.3, 158.5, 160.7, 161.5 ppm. HRMS (ESI): *m/z* calcd for C<sub>28</sub>H<sub>28</sub>NO<sub>5</sub> [M-H] 458.1967; found 458.1974.

**Compound 7d:** yellow solid; 81 % yield. <sup>1</sup>H NMR (DMSO-*d*<sub>6</sub>): δ 3.73 (s, 3H, -OCH<sub>3</sub>), 3.81 (s, 3H, -OCH<sub>3</sub>), 3.84 (s, 3H, -OCH<sub>3</sub>), 6.23 (s, 1H, ArH), 6.79 (d, *J*=8.6 Hz, 2H), 6.83 (s, 2H, ArH), 7.12 (d, 1H, *J*=16.0 Hz, ArH), 7.28 (d, 1H, *J*=8.0 Hz, ArH), 7.36-7.47 (m, 6H, ArH), 7.77 (d, 2H, *J*=8.4 Hz, ArH), 8.04 (s, 1H, ArH). <sup>13</sup>C-NMR (DMSO-*d*<sub>6</sub>): δ 55.1, 55.6, 55.8, 87.4, 111.2, 114.7, 117.8, 118.4, 118.9, 124.8, 126.6, 127.6, 128.2, 129.5, 129.8, 131.9, 135.4, 138.5, 144.4, 158.5, 158.8, 158.9 ppm. HRMS (ESI): *m/z* calcd for C<sub>26</sub>H<sub>23</sub>N<sub>2</sub>O<sub>5</sub> [M-H] 443.1607; found 443.1604.

**Compound 7e:** yellow solid; 66 % yield. <sup>1</sup>H NMR (DMSO-*d*<sub>6</sub>): δ 3.75 (s, 3H, -OCH<sub>3</sub>), 3.81 (s, 6H, -OCH<sub>3</sub>), 3.89 (s, 3H, -OCH<sub>3</sub>), 6.60 (s, 1H, ArH), 6.91-7.07 (m, 6H, ArH), 7.22 (d, 1H, *J*=16.4 Hz, ArH), 7.45 (d, 2H, ArH, *J*=8.4 Hz), 7.68 (d, 2H, ArH and *J*=8 Hz), 7.83 (s, 1H, ArH) ppm. <sup>13</sup>C-NMR (DMSO-*d*<sub>6</sub>): δ 55.6, 55.9, 55.9, 56.1, 98.2, 102.2, 114.7, 115.5, 117.2, 117.6, 123.7, 126.1, 128.5, 129.6, 129.7, 129.9, 131.6, 133.8, 138.9, 139.4, 158.9, 159.7, 161.6 ppm. HRMS (ESI): *m/z* calcd for C<sub>27</sub>H<sub>26</sub>NO<sub>4</sub> [M-H] 428.1862; found 428.1868.

**Compound 7f:** yellow solid; 60 % yield. <sup>1</sup>H NMR (DMSO-*d*<sub>6</sub>): δ 3.78 (s, 3H, -OCH<sub>3</sub>), 3.86 (s, 3H, -OCH<sub>3</sub>), 3.88 (s, 3H, -OCH<sub>3</sub>), 6.18 (s, 1H, ArH), 6.75 (d, *J*=8.6 Hz, 2H), 6.83 (s, 2H, ArH), 7.12 (d, 1H, *J*=16.0 Hz, ArH), 7.28 (d, 1H, *J*=16.0 Hz, ArH), 7.43-7.50 (m, 6H, ArH), 7.77 (d, 2H, *J*=8.4 Hz, ArH), 8.01 (s, 1H, ArH). <sup>13</sup>C-NMR (DMSO-*d*<sub>6</sub>): δ 55.7, 55.2, 56.4, 99.1, 101.2, 114.7, 117.3, 117.9, 118.9, 124.8, 126.6, 127.6, 128.2, 129.5, 129.8, 131.9, 135.4, 138.5, 140.2, 158.6, 158.8, 162.4 ppm. HRMS (ESI): *m/z* calcd for C<sub>27</sub>H<sub>23</sub>F<sub>3</sub>NO<sub>3</sub> [M-H] 466.1630; found 466.1628.

**Compound 7g:** pale yellow solid; 78 % yield. <sup>1</sup>H NMR (DMSO-*d*<sub>6</sub>): δ 3.74 (s, 3H, -OCH<sub>3</sub>), 3.82 (s, 3H, -OCH<sub>3</sub>), 3.89 (s, 3H, -OCH<sub>3</sub>), 6.13 (s, 1H, ArH), 6.93 (d, *J*=8.8 Hz, 2H), 6.98 (s, 2H, ArH), 7.08 (d, 1H, *J*=16.4 Hz, ArH), 7.22 (d, 1H, *J*=16.4 Hz, ArH), 7.45-7.51 (m, 6H, ArH), 7.76 (d, 2H, *J*=7.2 Hz, ArH), 7.98 (s, 1H, ArH). <sup>13</sup>C-NMR (DMSO-*d*<sub>6</sub>): δ 55.5, 55.9, 56.1, 98.2, 102.2, 114.7, 115.5, 117.1, 117.59, 123.6, 126.0, 128.4, 129.5, 129.6, 129.9, 131.9, 133.8, 138.9, 139.4, 158.8, 159.6, 161.6 ppm. HRMS (ESI): *m/z* calcd for C<sub>26</sub>H<sub>24</sub>NO<sub>3</sub> [M-H] 398.1756; found 398.1760.
